# Supplementary material for: A Conserved Dopamine-Cholecystokinin Signaling Pathway Shapes Context–Dependent Caenorhabditis elegans Behavior
Source: PubMed Central journal article supplement (PMC4148232; doi:10.1371/journal.pgen.1004584), 2014-08-28

**A****M2 transmembrane domain**

|        |                            |
|--------|----------------------------|
| UNC-29 | EKITLTISVLLSIVVFLLLVSKILP  |
| UNC-38 | EKVTLCSISILVALTIFFLLLTEIIP |
| LEV-1  | EKMGLTMNVLLSIVVFLLLCSKILP  |
| UNC-63 | EKISLCISILISLTVFFLLLVEIIP  |
| LEV-8  | EHKMTYSISVLVAFSVFYLVLIDLI  |
| ACR-16 | EKITLQITVLLSICFFLSIVSEMSP  |
| ALPHA7 | EKISLGITVLLSLTVFMLLVAEIMP  |
| BETA4  | EKMTLCISVLLALTFLLLSKIVP    |

**B**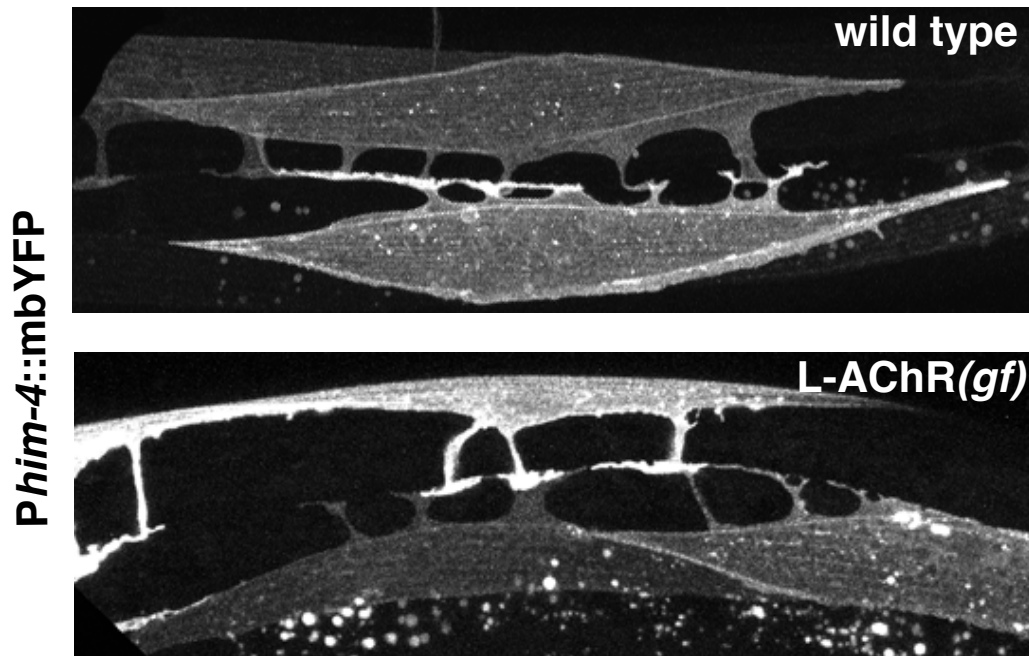**C*****Pacr-2::mCherry-RAB-3***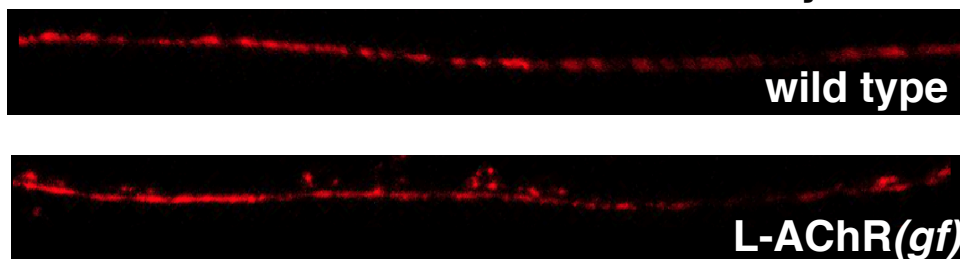

Supplement: pgen.1004584.s001.pdf [file pgen.1004584.s001.pdf]
