# Supplementary material for: A Conserved Dopamine-Cholecystokinin Signaling Pathway Shapes Context–Dependent Caenorhabditis elegans Behavior
Source: PubMed Central journal article supplement (PMC4148232; doi:10.1371/journal.pgen.1004584), 2014-08-28
Supplement: pgen.1004584.s004.pdf [file pgen.1004584.s004.pdf]

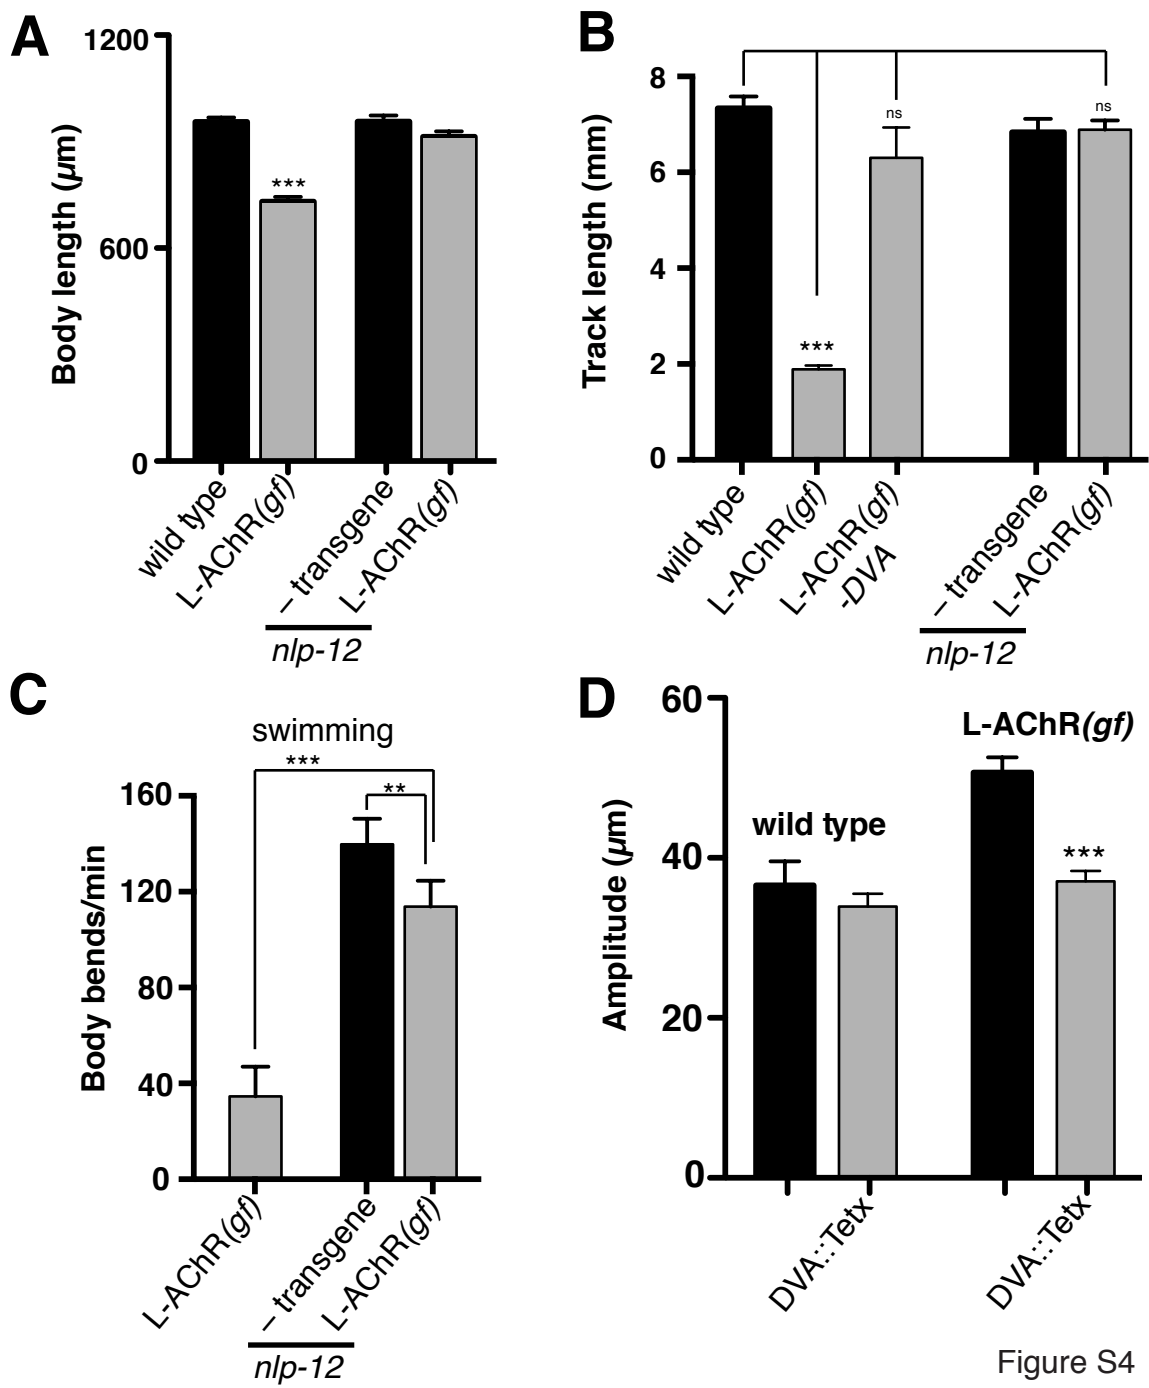

Figure S4
