# Supplementary material for: A Conserved Dopamine-Cholecystokinin Signaling Pathway Shapes Context–Dependent Caenorhabditis elegans Behavior
Source: PubMed Central journal article supplement (PMC4148232; doi:10.1371/journal.pgen.1004584), 2014-08-28
Supplement: pgen.1004584.s006.pdf [file pgen.1004584.s006.pdf]

**A****control**

10 ms

250 pA  
50 ms**L-AChR(*gf*)**

10 ms

**B**

Amplitude (pA)

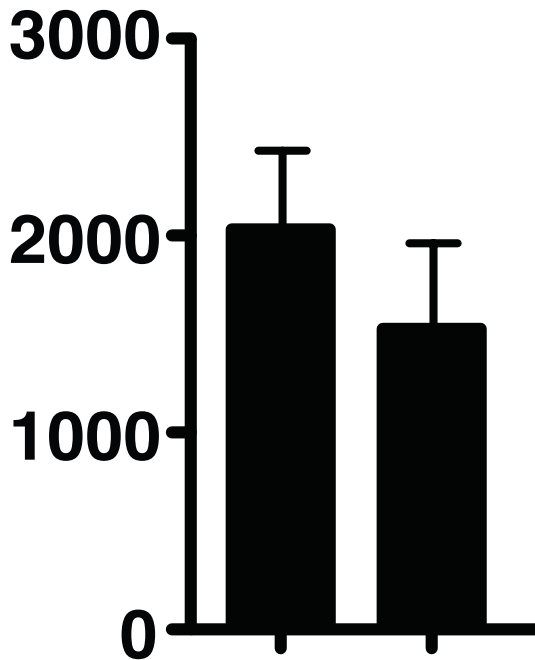**C**

Decay Constant (s)

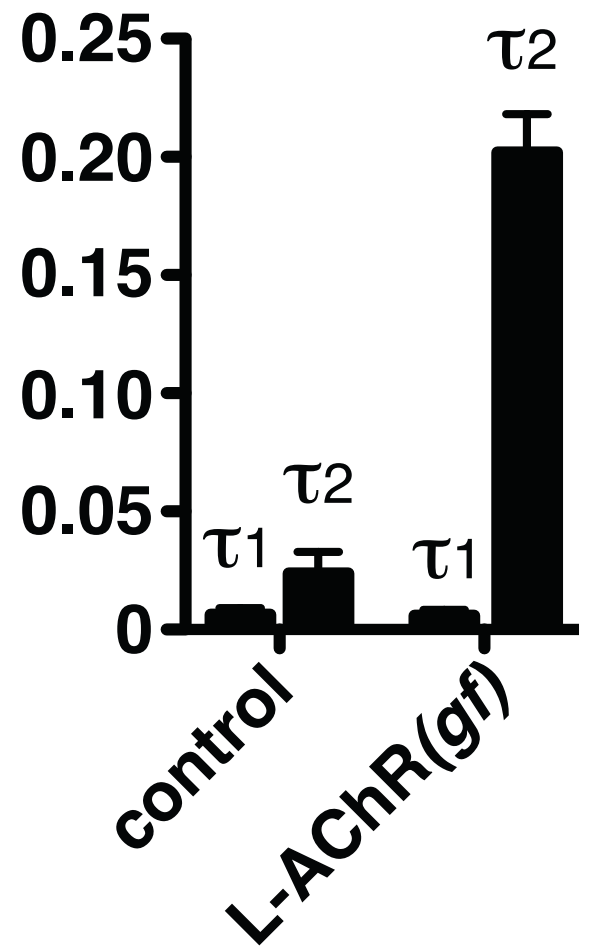

Figure S6
