# Supplementary material for: A Conserved Dopamine-Cholecystokinin Signaling Pathway Shapes Context–Dependent Caenorhabditis elegans Behavior
Source: PubMed Central journal article supplement (PMC4148232; doi:10.1371/journal.pgen.1004584), 2014-08-28
Supplement: pgen.1004584.s007.pdf [file pgen.1004584.s007.pdf]

## DNA Constructs

***nlp-12* Entry Vectors** (OMF761) 5'-CACCATTATTTTTTAAATTTCTATTTTTTTC-3' (forward) and (OMF762) 5'-TTGCCATTCCCAGATTGGCTCGAGC-3' or (OMF860) 5'-CACCTTTGTCGGAGGCAATTGAAATAAGTTT-3' were utilized for generating the *nlp-12* entry clones. CACC was added to the 5' end of primers for directional cloning. The reverse primers were designed either just adjacent to the start codon (*nlp-12* promoter) or at the end of the coding region excluding the stop (*nlp-12* genomic).

**Destination Vectors** All destination vectors were engineered to contain the *ccdB* reading frame B cassette (Invitrogen, CA).

**pDest-17:** *ccdB* cassette was *Sma*I/*Sph*I subcloned into an existing plasmid containing mCherry to generate the destination vector pDest-17 (mCherry).

**pDest-27:** *ccdB* cassette was *Mfe*I/*Sph*I subcloned into an existing plasmid (pDest-24) containing the trans-splice leader and acceptor sequences followed by mCherry to obtain pDest-27 (SL2::mCherry).

**pDest-25 and pDest-34:** 720 bp VenusYFP and 1374 bp Tetanus light chain fragments were PCR amplified with 5'-ATTAACCGGTATGGTGAGCAAGGGCGAGGA-3' (OMF753), 5'-GCTAGCCGGCTTACTTGTACAGCTCGTCCA-3' (OMF754) and 5'-ATTAACCGGTATGCCGATCACCATCAACAAC-3' (OMF883), 5'-GCTAGCCGGCTTAAAGCGGTACGGTTGTACA-3' (OMF884) primer pairs. The forward and reverse primers contained restriction sites (underlined) for *Age*I and *Ngo*MIV, respectively. Digested PCR products were subcloned into *Age*I/*Ngo*MIV sites of an existing destination vector (pDest-8) replacing mCherry, to generate pDest-25 (VenusYFP) and pDest-34 (Tetanus toxin light chain).

**pDest-60:** pCL33 (*pacr-2::dop-1*) [51] was digested with *Bst*Z171 and *Nhe*I to remove the *acr-2* promoter fragment. *ccdB* cassette was cloned in to generate pDest-60 (*dop-1*).
